# Supplementary material
Source: PubMed Central journal article supplement (PMC5045320)
Supplement: NIHMS773869-supplement-1.pdf [file NIHMS773869-supplement-1.pdf]

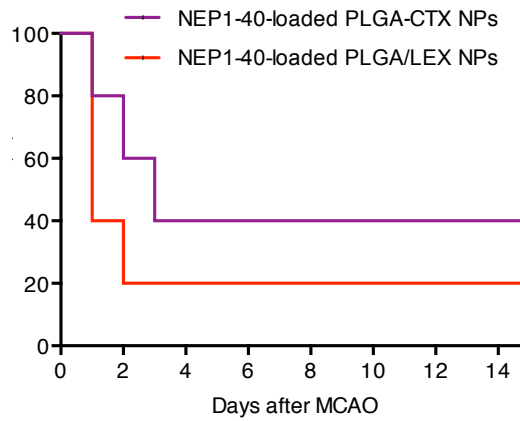

Supporting Figure 1. Kaplan-Meier survival curves of MCAO mice receiving indicated treatments. Mice were treated with NPs three times at 0, 24 and 48 hours after surgery. The dose was 22  $\mu\text{g}$  NEP1-40 per mouse.  $n = 5$ .
