# Supplementary material
Source: PubMed Central journal article supplement (PMC5045320)
Supplement: NIHMS773869-supplement-2.pdf [file NIHMS773869-supplement-2.pdf]

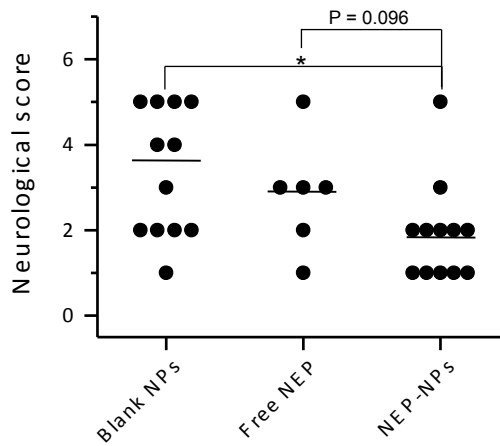

Supporting Figure 2. Neurological scores of MCAO mice receiving indicated treatments at day 3 after surgery. The number of mice in groups receiving treatment with NEP1-40-loaded NPs, blank NPs, and free NEP was 12, 12, and 6, respectively. The comparison between different groups was calculated by the Kruskal-Wallis rank sum test. p value for the overall difference among three groups is 0.045.  $*p < 0.05$ .
